# Supplementary material for: Immunotherapy for colorectal cancer
Source: Front Immunol. 2024 Aug 21;15:1433315. doi: 10.3389/fimmu.2024.1433315 (PMC11375682; doi:10.3389/fimmu.2024.1433315)
Supplement: Supplementary file 2 [file Table2.xlsx]

## Sheet: Sheet3
	Tab 2 Clinical trials using CAR-T in CRC.
	Study Title	NCT Number	Conditions	Interventions	Study Type	Result
	αPD1-MSLN-CAR T Cells for the Treatment of MSLN-positive Advanced Solid Tumors	NCT04503980	Colorectal Cancer|Ovarian Cancer	BIOLOGICAL: αPD1-MSLN-CAR T cells	INTERVENTIONAL	No
	CAR-T Intraperitoneal Infusions for CEA-Expressing Adenocarcinoma Peritoneal Metastases or Malignant Ascites (IPC)	NCT03682744	Colorectal Cancer	BIOLOGICAL: anti-CEA CAR-T cells	INTERVENTIONAL	No
	CAR-T Hepatic Artery Infusions and Sir-Spheres for Liver Metastases	NCT02416466	Liver Metastases	BIOLOGICAL: anti-CEA CAR-T cells|DEVICE: Sir-Spheres	INTERVENTIONAL	No
	A Study to Evaluate the Safety and Efficacy of A2B530, a Logic-gated CAR T, in Subjects With Solid Tumors That Express CEA and Have Lost HLA-A*02 Expression	NCT05736731	Colorectal Cancer|Colorectal Neoplasms|Colorectal Adenocarcinoma|CRC|	BIOLOGICAL: A2B530|DIAGNOSTIC_TEST: xT-Onco with HLA-LOH Assay	INTERVENTIONAL	No
	Study of Pembrolizumab Treatment After CYAD-101 With FOLFOX Preconditioning in Metastatic Colorectal Cancer	NCT04991948	Unresectable Metastatic Colorectal Cancer	DRUG: CYAD-101|DRUG: FOLFOX|DRUG: Pembrolizumab	INTERVENTIONAL	No
	NKG2D CAR-T Cells to Treat Patients With Previously Treated Liver Metastatic Colorectal Cancer	NCT05248048	Refractory Metastatic Colorectal Cancer	BIOLOGICAL: CAR-T infusion	INTERVENTIONAL	No
	A Clinical Trial Targeting CEA Chimeric Antigen Receptor T (CAR-T) for CEA Positive Advanced Malignant Solid Tumors	NCT06043466	Colorectal Cancer	BIOLOGICAL: CEA-targeted CAR-T cells	INTERVENTIONAL	No
	Solid Tumor Analysis for HLA Loss of Heterozygosity (LOH) and Apheresis for CAR T- Cell Manufacturing	NCT04981119	Solid Tumor, Adult|Colorectal Cancer	OTHER: Apheresis|DIAGNOSTIC_TEST: Next Generation Sequencing (NGS)|DIAGNOSTIC_TEST: Long Range NGS HLA typing	OBSERVATIONAL	No
	Dose Escalation and Dose Expansion Phase I Study to Assess the Safety and Clinical Activity of Multiple Doses of NKR-2 Administered Concurrently With FOLFOX in Colorectal Cancer With Potentially Resectable Liver Metastases	NCT03310008	Colon Cancer Liver Metastasis	BIOLOGICAL: NKR-2 cells	INTERVENTIONAL	No
	GCC19CART for Patients With Metastatic Colorectal Cancer	NCT05319314	Colorectal Cancer	DRUG: GCC19CART	INTERVENTIONAL	No
	Anti-CEA CAR-T Cells to Treat Colorectal Liver Metastases	NCT05240950	Colorectal Cancer	DRUG: Anti-CEA CAR-T Cells	INTERVENTIONAL	No
	A Study to Evaluate the Safety and Efficacy of A2B694, a Logic-gated CAR T, in Subjects With Solid Tumors That Express MSLN and Have Lost HLA-A*02 Expression	NCT06051695	Solid Tumor, Adult|Colorectal Cancer|Colorectal Adenocarcinoma|CRC|Colon Cancer	BIOLOGICAL: A2B694|DIAGNOSTIC_TEST: xT CDx with HLA-LOH Assay	INTERVENTIONAL	No
	Safety and Efficacy of CEA-Targeted CAR-T Therapy for Relapsed/Refractory CEA+ Cancer	NCT04348643	Colorectal Cancer	BIOLOGICAL: CEA CAR-T cells	INTERVENTIONAL	No
	P-MUC1C-ALLO1 Allogeneic CAR-T Cells in the Treatment of Subjects With Advanced or Metastatic Solid Tumors	NCT05239143	Colorectal Cancer	BIOLOGICAL: P-MUC1C-ALLO1 CAR-T cells|DRUG: Rimiducid	INTERVENTIONAL	No
	NKG2D CAR-T(KD-025) in the Treatment of Relapsed or Refractory NKG2DL+ Tumors	NCT04550663	Colorectal Cancer	DRUG: KD-025 CAR-T cells	INTERVENTIONAL	No
	Tailoring Treatment in Colorectal Cancer	NCT05401318	Colorectal Neoplasms	PROCEDURE: Tumor tissue sampling for organoid development	OBSERVATIONAL	No
	A Phase 1/2 Study to Evaluate CHM-2101, an Autologous Cadherin 17 Chimeric Antigen Receptor (CAR) T Cell Therapy	NCT06055439	Colorectal Cancer	BIOLOGICAL: CHM-2101 CAR-T cells	INTERVENTIONAL	No
	A Clinical Study of CEA-targeted CAR-T in the Treatment of CEA-positive Advanced Malignant Solid Tumors	NCT05396300	Colorectal Cancer	BIOLOGICAL: CEA CAR-T cells	INTERVENTIONAL	No
	Haplo / Allogeneic NKG2DL-targeting Chimeric Antigen Receptor-grafted γδ T Cells for Relapsed or Refractory Solid Tumour	NCT04107142	Colorectal Cancer	BIOLOGICAL: Adoptive Cell Transfer of NKG2DL-targetting Chimeric Antigen Receptor-grafted Gamma Delta T cell	INTERVENTIONAL	No
	A Study of Chimeric Antigen Receptor T Cells Combined With Interventional Therapy in Advanced Liver Malignancy	NCT02959151	Colorectal Cancer Metastatic	DRUG: CAR-T cell	INTERVENTIONAL	No
	IMC001 for Clinical Research on Advanced Digestive System Malignancies	NCT05028933	Advanced Colorectal Cancer	DRUG: EPCAM CAR-T	INTERVENTIONAL	No
	Clinical Study of CEA-targeted CAR-T Therapy for CEA-positive Advanced Malignant Solid Tumors	NCT05415475	Colorectal Cancer	BIOLOGICAL: CEA CAR-T cells	INTERVENTIONAL	No
	Treatment of Relapsed and/or Chemotherapy Refractory Advanced Malignancies by CART133	NCT02541370	Colorectal Cancer	BIOLOGICAL: anti-CD133-CAR vector-transduced T cells	INTERVENTIONAL	CART-133 cell therapy demonstrates promising antitumor activity and a manageable safety profile.
	Binary Oncolytic Adenovirus in Combination With HER2-Specific Autologous CAR VST, Advanced HER2 Positive Solid Tumors	NCT03740256	Colorectal Cancer	BIOLOGICAL: CAdVEC	INTERVENTIONAL	In both preclinical and clinical studies, CAdVEC is safe and even at extremely low doses is sufficiently potent to induce significant tumor control through oncolysis and immune repolarization.
	Enhanced Monitoring for Better Recovery and Cancer Experience in Greater Manchester	NCT05099237	Colorectal Cancer|CAR T-Cell Therapy	DEVICE: OURA Ring|DEVICE: WithingsScan Watch|DRUG: Isansys Patient Status Engine|OTHER: Quality of Life Surveys|DIAGNOSTIC_TEST: Blood Samples|OTHER: Daily Weights	INTERVENTIONAL	No
